# Supplementary material
Source: PubMed Central journal article supplement (PMC8447821)
Supplement: sj-pdf-1-neu-10.1177_1971400921998979.pdf [file sj-pdf-1-neu-10.1177_1971400921998979.pdf]

## Supplementary file

### **Glioblastoma and Primary Central Nervous System Lymphoma: Differentiation using MRI derived First-order texture analysis- A machine learning study**

#### **Texture & Machine learning in Glioblastoma & CNS lymphoma**

#### **Author names and affiliations**

Sarv Priya<sup>1\*</sup>, MD

Caitlin Ward<sup>2</sup>, MS

Thomas Locke<sup>1</sup> MD

Neetu Soni<sup>1</sup> MD

Ravishankar Pillenahalli Maheshwarappa<sup>1</sup> MD

Varun Monga<sup>3</sup>, MD

Amit Agarwal<sup>4</sup>, MD

Girish Bathla<sup>1</sup> MBBS, FRCR

1: Department of Radiology, University of Iowa Hospitals and Clinics, Iowa City, IA, USA

2: Department of Biostatistics, University of Iowa, Iowa City, IA, USA

3: Department of Medicine, University of Iowa Hospitals and Clinics, Iowa City, IA, USA

4: Department of Radiology, University of South Western Medical Center, Dallas, Texas, USA

**Funding:** No funding was received for this study.

**Type of manuscript:** Original research

#### **\*Correspondence:**

Dr Sarv Priya

Department of Radiology,

University of Iowa Hospitals & Clinics,

200 Hawkins Drive

Iowa City, IA, 52242,

USA +1 319-512-5404

E-mail: [sarv-priya@uiowa.edu](mailto:sarv-priya@uiowa.edu)Supplementary

**Supplementary Table 1: Total number of features used in each modeling approach when fit to full data set**

|                         | Whole Tumor |      |     | Single Slice |      |     |
|-------------------------|-------------|------|-----|--------------|------|-----|
|                         | Full        | Corr | PCA | Full         | Corr | PCA |
| <b>All other models</b> | 36          | 19   | 8   | 36           | 20   | 8   |
| <b>ada</b>              | 31          | 18   | 7   | 29           | 19   | 7   |
| <b>enet</b>             | 34          | 10   | 7   | 6            | 12   | 7   |
| <b>gbrm</b>             | 31          | 18   | 7   | 21           | 19   | 7   |
| <b>lasso</b>            | 17          | 8    | 7   | 6            | 6    | 7   |
| <b>rf</b>               | 35          | 18   | 7   | 35           | 19   | 7   |

*Ada: adaboost; enet: elastic net; gbrm: gradient boost regression model; lasso: (least absolute shrinkage and selection operator); rf: random forest' full: full feature set; corr: high correlation filter; pca: principal component analysis*

**Supplementary Table 2: Prior studies utilizing texture analysis for differentiating glioblastoma from primary CNS lymphoma**

| Authors                                | Number of patients   | Sequence(s)                   | 2D/3D                                | Type of Texture parameters                    | Discriminating features                                                                                                                                                         | Machine Learning                                                       | Deep Learning/CNN |
|----------------------------------------|----------------------|-------------------------------|--------------------------------------|-----------------------------------------------|---------------------------------------------------------------------------------------------------------------------------------------------------------------------------------|------------------------------------------------------------------------|-------------------|
| <b>Priya et al (current study)</b>     | GBM: 97<br>PCNSL: 46 | T1W contrast enhanced         | 2D- all tumor slices (2D volumetric) | Filtration-based first order texture features | LASSO model (high correlation filter) and multilayer perceptron network (high correlation filter performed best for whole (AUC 0.924) and single slice (AUC 0.914) respectively | Yes; three feature selection and 12 machine learning classifier models | No                |
| <b>Kunimatsu et al<sup>24</sup></b>    | GBM-44<br>PCNSL-16   | T1W contrast enhanced         | 2D-Single slice                      | First and second order                        | PCA analysis showed first-order entropy, median, GLRLM-based RLNU, run-percentage (AUC not provided)                                                                            | No                                                                     | No                |
| <b>Xiao et al<sup>25</sup></b>         | GBM-60<br>PCNSL-22   | T1W contrast enhanced         | 2D- Multislice                       | First and second order and geometric features | First order Skewness, first order Kurtosis, and Ngtdm Busyness showed high discriminatory power (AUC 0.86).                                                                     | Yes; Naïve Bayes: Best Classifier model (AUC 0.90)                     | No                |
| <b>Alcaide-Leon et al<sup>26</sup></b> | GBM-71<br>PCNSL-35   | T1W contrast enhanced         | 2D- Multislice                       | First and second order                        | SVM classifier model is non-inferior to expert human evaluation (p <0.05, mean AUC 0.877)                                                                                       | Yes; SVM                                                               | No                |
| <b>Suh et al<sup>27</sup></b>          | GBM-23<br>PCNSL-54   | T1W post contrast, T2W, FLAIR | 2D- Multislice (contrast enhancing)  | First order, second order, wavelet            | AUC of the classifier model (0.921) was significantly higher than three radiology readers and ADC                                                                               | Yes; Random Forest                                                     | No                |

|                                    |                                                                                                                                   |                                                    | g portion only)                                                                                 | transformed and shape features            | values ( $p < 0.001$ for all).                                                                                                                                                                                        |                                                                                                                            |    |
|------------------------------------|-----------------------------------------------------------------------------------------------------------------------------------|----------------------------------------------------|-------------------------------------------------------------------------------------------------|-------------------------------------------|-----------------------------------------------------------------------------------------------------------------------------------------------------------------------------------------------------------------------|----------------------------------------------------------------------------------------------------------------------------|----|
| <b>Kim et al<sup>21</sup></b>      | GBM- 78<br>Discovery cohort-49<br><br>Validation cohort-29<br><br>PCNSL-65<br><br>Discovery cohort-37<br><br>Validation cohort-28 | T1W post contrast, T2W, Diffusion weighted imaging | 3D-<br><br>Contrast enhancing and contrast enhancing plus non-enhancing peritumoral edema       | First and second order and shape features | Classifier model using 15 selected features performed well to distinguish between GBM and PCNSL with an AUC OF 0.979 in the discovery cohort with similar performance in the validation cohort (AUC 0.956)            | Yes,<br><br>Logistic regression , SVM, and random forest.<br><br>Logistic regression had highest AUC in validation cohorts | No |
| <b>Wang et al<sup>22</sup></b>     | GBM- 81<br><br>PCNSL- 28                                                                                                          | T2W                                                | 2D-<br>Single slice with maximal dimension in axial plane. ROI placed on enhancing segment only | Second order                              | Angular second momentum, contrast, correlation, inverse difference moment and entropy were significant in differentiating between GBM and PCNSL ( $p < 0.05$ ). Highest AUC 0.752 for second-order texture "Contrast" | No                                                                                                                         | No |
| <b>Nakagawa et al<sup>23</sup></b> | GBM-45<br><br>PCNSL-25                                                                                                            | T2W, ADC maps, rCBV maps and T1W contrast enhanced | 2D-<br>Single slice in maximal axial dimension                                                  | Second-order GLCM                         | Machine learning model based on histogram and texture features (multivariate regression AUC 0.98) was superior to conventional cut-off                                                                                | Multivariate extreme gradient boosting-XGBoost                                                                             | No |

|                                |                                                                                                                                                                         |                                                   |                                    |                                                    |                                                                                                                                                                                                                                                                                                                                                                               |                                                                                           |                                          |
|--------------------------------|-------------------------------------------------------------------------------------------------------------------------------------------------------------------------|---------------------------------------------------|------------------------------------|----------------------------------------------------|-------------------------------------------------------------------------------------------------------------------------------------------------------------------------------------------------------------------------------------------------------------------------------------------------------------------------------------------------------------------------------|-------------------------------------------------------------------------------------------|------------------------------------------|
|                                |                                                                                                                                                                         |                                                   |                                    |                                                    | method and radiologists (AUC 0.84, and 0.79) (p <0.05)                                                                                                                                                                                                                                                                                                                        | (AUC 0.980)                                                                               |                                          |
| <b>Yun et al<sup>19</sup></b>  | GBM-91<br>PCNSL-62<br><br>Training set: 50 PCNSL, and 73 GBM;<br><br>Internal validation set: 12 PCNSL, and 18 GBM;<br><br>External validation set: 14 PCNSL and 28 GBM | T1W contrast enhanced, Diffusion weighted imaging | 3D-Contrast enhanced portions only | First order, Second order and wavelet features     | Combination of radiomics and MLP network classifier (AUC 0.947) was best in differentiating between two groups while CNN (AUC 0.486) showed the lowest performance in external validation sets. Performance of MPL network highest in external validation set (AUC 0.947), followed by human readers (AUC 0.913 and 0.930) and machine-learning classifier model (AUC 0.811). | Yes, Supervised machine learning                                                          | CNN, Multilayer perceptron network (MLP) |
| <b>Kang et al<sup>20</sup></b> | Training set: 70 GBM, and 42 PCNSL<br><br>Internal validation sets: 21 GBM, 21 PCNSL;<br><br>External validation sets: 28 GBM, and 14 PCNSL                             | Diffusion weighted imaging, T1W contrast enhanced | 3D-enhancing portion only          | First and second order, shape and wavelet features | Diffusion radiomics model performed better than conventional radiomics (AUC 0.944 versus 0.819) and similar to human readers (AUC 0.896-0.930) in external validation set                                                                                                                                                                                                     | Yes, 8 classifier models.<br><br>ADC model, AUC = 0.983.<br><br>T1W-CE model AUC = 0.976) | No                                       |

|                                  |                     |                                                          |                             |                                                         |                                                                                                 |                                                                                |     |
|----------------------------------|---------------------|----------------------------------------------------------|-----------------------------|---------------------------------------------------------|-------------------------------------------------------------------------------------------------|--------------------------------------------------------------------------------|-----|
| <b>Yang et al<sup>28</sup></b>   | GBM-58, PCNSL-37    | Multiparametric (T1W, T2W, FLAIR, T1W contrast-enhanced) | Key-slices (not volumetric) | Intensity, shape, histogram and texture features        | Global accuracy of 96.84% to differentiate GBM and PCNSL                                        | Yes (SVM)                                                                      | No  |
| <b>Liu et al<sup>2</sup></b>     | GBM-107<br>PCNSL-60 | T1W contrast enhanced                                    | 2D, multi-slice             | Fractal analysis, Fractal dimension (FD) and lacunarity | PCNSL had lower FD values ( $p < 0.001$ ) and higher lacunarity values ( $p < 0.001$ ) than GBM | No                                                                             | No  |
| <b>Nguyen et al<sup>29</sup></b> | Meta-analysis       |                                                          |                             |                                                         | Machine-learning model lowest AUC 0.878. Machine-learning performed better than radiologists.   | Machine-learning performed poorly when applied to external validation datasets | Yes |
